# Supplementary material for: Antimicrobial activity of carbon monoxide-releasing molecule [Mn(CO)3(tpa-κ3N)]Br versus multidrug-resistant isolates of Avian Pathogenic Escherichia coli and its synergy with colistin
Source: PLoS One. 2017 Oct 17;12(10):e0186359. doi: 10.1371/journal.pone.0186359 (PMC5645124; doi:10.1371/journal.pone.0186359)
Supplement: S7 Table — (XLSX) [file pone.0186359.s007.xlsx]

## Sheet: Sheet1
99/12
0h				24h				48h				72h
PBS	Mn complex	Colistin	Combination	PBS	Mn complex	Colistin	Combination	PBS	Mn complex	Colistin	Combination	PBS	Mn complex	Colistin	Combination
1	1	1	1	22	23	16	8	32	28	21	8	38	32	25	9	R1
1	1	1	1	23	23	18	8	30	26	20	8	37	30	25	9	R2
1	1	1	1	22	20	18	6	30	28	22	8	36	32	20	8	R3
236/12
0h				24h				48h				72h
PBS	Mn complex	Colistin	Combination	PBS	Mn complex	Colistin	Combination	PBS	Mn complex	Colistin	Combination	PBS	Mn complex	Colistin	Combination
0	0	0	0	33	36	5	4	40	41	16	6	43	47	17	9	R1
0	0	0	0	34	35	4	3	39	43	15	4	40	45	16	5	R2
0	0	0	0	35	37	7	4	38	45	13	5	39	48	14	5	R3
