# Supplementary material for: Antimicrobial activity of carbon monoxide-releasing molecule [Mn(CO)3(tpa-κ3N)]Br versus multidrug-resistant isolates of Avian Pathogenic Escherichia coli and its synergy with colistin
Source: PLoS One. 2017 Oct 17;12(10):e0186359. doi: 10.1371/journal.pone.0186359 (PMC5645124; doi:10.1371/journal.pone.0186359)
Supplement: S8 Table — (XLSX) [file pone.0186359.s008.xlsx]

## Sheet: S8 Table
236/12
Time (h)	PBS			Mn complex			Colistin			Mn complex + Colistin
0	560000	420000	460000	560000	420000	460000	560000	420000	460000	560000	420000	460000
2	1000000	800000	1200000	40000	50000	76000	3000	1000	6000	10	28	30
4	2100000	1100000	3400000	10000	23000	41000	30000	21000	15000	10	15	9
6	6300000	4800000	6900000	41000	62000	81000	30000	41000	28900	1	1	1
12	8900000	7700000	9900000	500000	710000	1500000	40000	45000	84000	1	1	1
24	10000000	9900000	20000000	800000	920000	2700000	200000	70000	320000	1	1	1
99/12
Time (h)	PBS			Mn complex			Colistin			Mn complex + Colistin
0	240000	380000	180000	240000	380000	180000	240000	380000	180000	240000	380000	180000
2	220000	520000	14000	78000	86000	41000	2400	6400	1100	100	220	78
4	590000	700000	380000	65000	72000	35000	6000	11000	1000	78	124	32
6	4100000	980000	1100000	49000	55000	27000	8200	22000	4200	14	20	10
12	7900000	8800000	4600000	420000	611000	120000	43000	77000	8900	14	20	10
24	10000000	50000000	9000000	870000	970000	460000	160000	780000	26000	13	12	5
